# Supplementary material for: Mammalian SIRT6 Represses Invasive Cancer Cell Phenotypes through ATP Citrate Lyase (ACLY)-Dependent Histone Acetylation
Source: MDPI journal article supplement (doi:10.3390/genes12091460), 2021-09-21
Supplement: s1 [file s1]

### Supplementary Figure S1

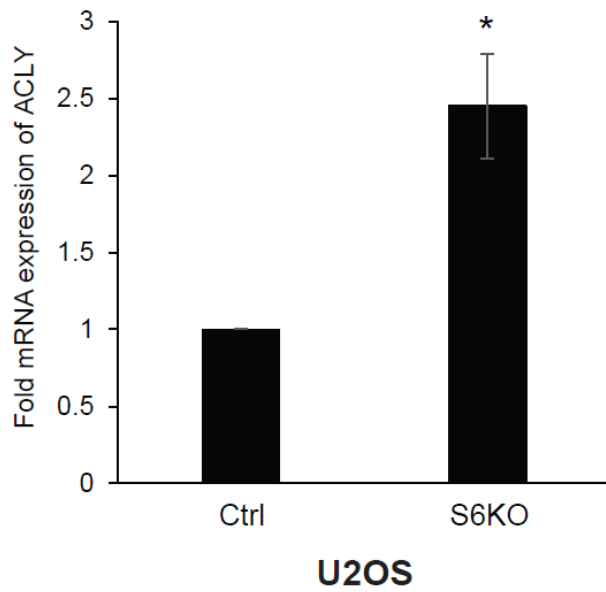

**Supplementary Figure S1.** ACLY mRNA levels in SIRT6-deficient U2OS cells. Increased expression of ACLY mRNA in S6KO compared to control U2OS cells, normalized to GAPDH (Mean  $\pm$  SEM of 3 independent experiments, \*  $p < 0.05$ , two-tailed Student's t-test).

## Supplementary Figure S2

**A**

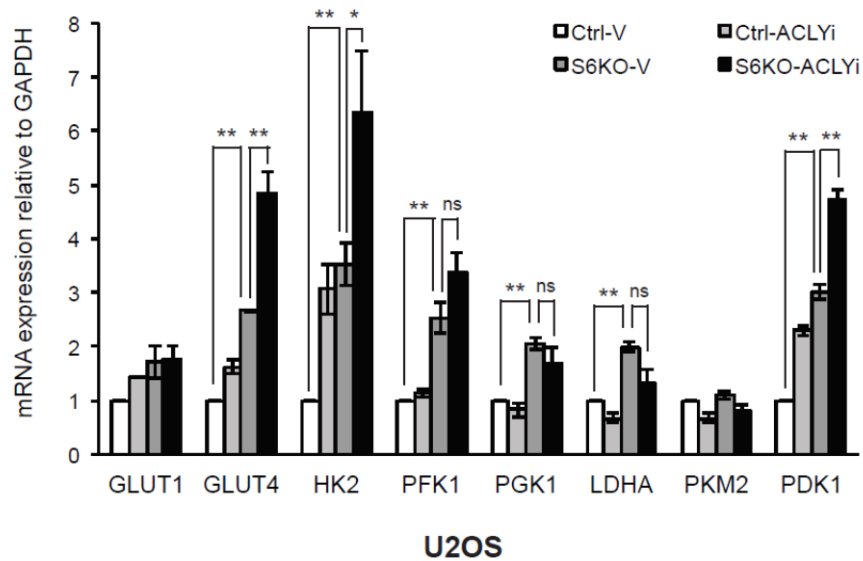

**B**

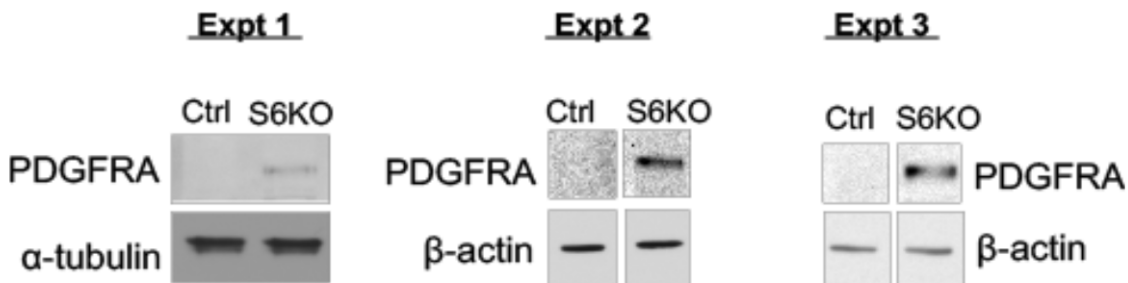

**Supplementary Figure S2.** Impact of SIRT6-deficiency and ACLY inhibition on expression of major glycolytic genes and PDGFRA in U2OS cells. **A.** mRNA levels of major glycolytic genes in control and SIRT6 KO U2OS cells treated with 50  $\mu$ M ACLY inhibitor for 24 hours (Mean  $\pm$  SEM of 3 independent experiments, \*  $p < 0.05$ , \*\*  $p < 0.01$ , ns: not significant, two-tailed Student's t-test). **B.** Western blots showing increased PDGFRA protein in SIRT6 knockout (S6KO) U2OS cells. Three independent experiments are shown. Tubulin or beta-actin are shown as loading controls. In experiments 2 and 3, the lanes are cropped to remove irrelevant lanes between them, and the control and S6KO lanes show identical exposures.

## Supplementary Figure S3

**A**

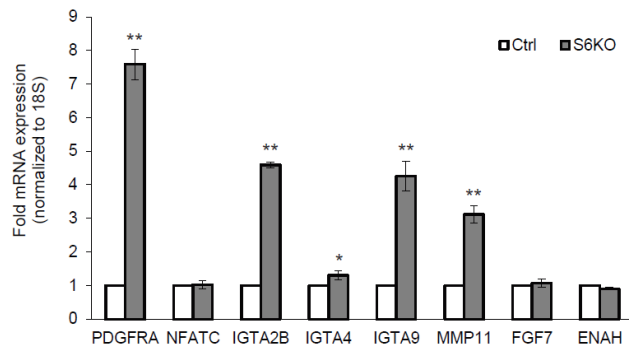

**B**

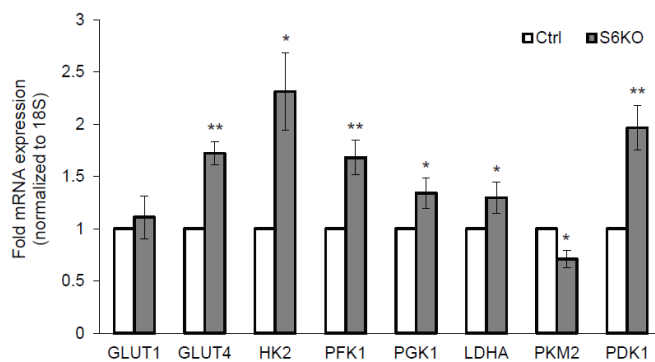

**C**

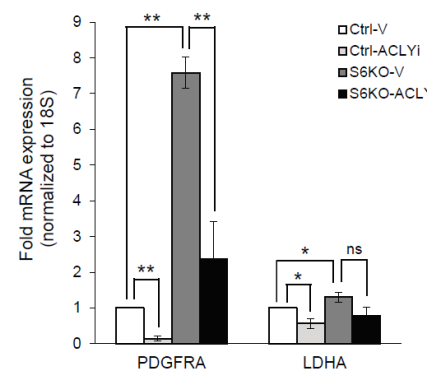

**D**

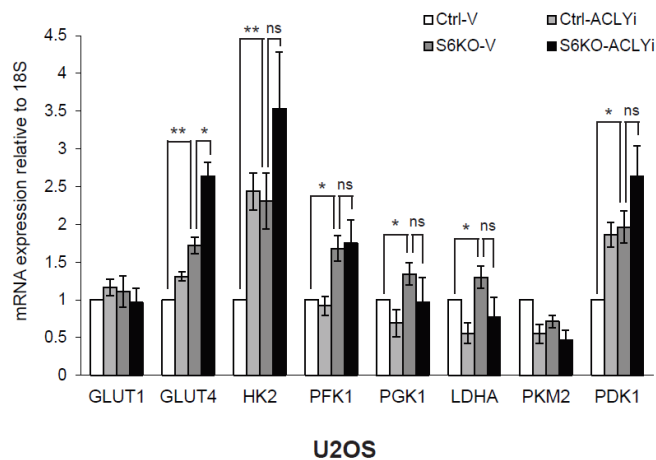

**Supplementary Figure S3.** qPCR data analysis of mRNA levels normalized to 18S rRNA in U2OS cells. **A.** Expression of acetyl-CoA responsive genes in control and SIRT6 KO U2OS cells normalized to 18S rRNA (Mean  $\pm$  SEM of 3 independent experiments, \*  $p < 0.05$ , \*\*  $p < 0.01$ , two-tailed Student's t-test). **B.** Expression of glycolytic genes in control and SIRT6 KO cells normalized to 18S rRNA (Mean  $\pm$  SEM of 3 independent experiments, \*  $p < 0.05$ , \*\*  $p < 0.01$ , two-tailed Student's t-test).

0.01, one-tailed Student's t-test). **C.** Increased expression of PDGFRA but not LDHA in SIRT6 KO cells is attenuated by ACLY inhibitor (ACLYi, 50 uM; 24 hours). Data are normalized to 18S rRNA and show Mean  $\pm$  SEM of 3 independent experiments, \*  $p < 0.05$ , \*\*  $p < 0.01$ , ns: not significant, one-tailed Student's t-test). **D.** Expression of glycolytic genes in control and SIRT6 KO cells treated with 50 uM ACLY inhibitor for 24 hours, normalized to 18S rRNA (Mean  $\pm$  SEM of 3 independent experiments, \*  $p < 0.05$ , \*\*  $p < 0.01$ , ns: not significant, one-tailed Student's t-test).

**Supplementary Table S1**

| <b>Table S1 Primers used in QPCR analysis</b> |                                                                                       |
|-----------------------------------------------|---------------------------------------------------------------------------------------|
| <b>mRNA Expression</b>                        | <b>Primer sequence</b>                                                                |
| GLUT1                                         | Forward: 5'- TATCGTCAACACGGCCTTCACTGT-3'<br>Reverse: 5'- CACAAAGCCAAAGATGGCCACGAT-3'  |
| GLUT4                                         | Forward: 5'- CAACAGATAGGCTCCGAAGATG-3'<br>Reverse: 5'- CCAAGCCACTGAGAGATGATAC-3'      |
| LDHA                                          | Forward: 5'- TGGTCCAGCGTAACGTGAACATCT-3'<br>Reverse: 5'- TTGCAACCGCTTCCAATAACACGG-3'  |
| HK2                                           | Forward: 5'- CTGCAGCGCATCAAGGAGAACAAA-3'<br>Reverse: 5'- ACGGTCTTATGTAGACGCTTGGCA-3'  |
| PGK1                                          | Forward: 5'- TCACTCGGGCTAAGCAGATTGTGT-3'<br>Reverse: 5'- CGTGTTCATTGTCACAGCAAGT-3'    |
| PDK1                                          | Forward: 5'- TCATGTCACGCTGGGTAATGAGGA-3'<br>Reverse: 5'- AACACGAGGTCTTGGTGCAGTTGA-3'  |
| PFK1                                          | Forward: 5'- GTGGCTCTAACTTGGGACTAAA-3'<br>Reverse: 5'- GTTGGAGACTGTAGCAGGAATG-3'      |
| PKM2                                          | Forward: 5'- ATTATTTGAGGAACTCCGCCGCCT-3'<br>Reverse: 5'- CATTTCATGGCAAAGTTCACCCGGA-3' |
